# Supplementary material for: Time Trends of Crohn’s Disease in Catalonia from 2011 to 2017. Increasing Use of Biologics Correlates with a Reduced Need for Surgery
Source: PubMed Central journal article supplement (PMC7563515; doi:10.3390/jcm9092896), 2020-09-08
Supplement: jcm-09-02896-s001.pdf [file jcm-09-02896-s001.pdf]

## Supplementary Files

**Supplementary Table S1.** List of ICD-9 diagnoses for CD.

| 555  | <b>Crohn's Disease</b>                                                                                                                                            |
|------|-------------------------------------------------------------------------------------------------------------------------------------------------------------------|
| 5550 | Small bowel regional enteritis. Crohn's disease of duodenum, ileum, jejunum; ileitis: regional, segmental, terminal                                               |
| 5551 | Large bowel regional enteritis. Crohn's disease of colon, large bowel, rectum; granulomatous, regional or transmural colitis: granulomatous, regional, transmural |
| 5552 | Small and large bowel regional enteritis. Ileo-colitis regional                                                                                                   |
| 5559 | Regional enteritis unspecified. Crohn's disease NOS, regional enteritis NOS                                                                                       |

**Supplementary Table S2.** List of drugs used in CD and ATC codes.

| <b>Non-Biological Immunosuppressive Treatment</b> |                                   |
|---------------------------------------------------|-----------------------------------|
| L04AX01                                           | Azathioprine                      |
| L01BB02                                           | Mercaptopurine                    |
| L04AX03                                           | Methotrexate                      |
| L04AD01                                           | Cyclosporine                      |
| <b>Salicylates</b>                                |                                   |
| A07EC02                                           | Mesalazine                        |
| A07EC01                                           | Sulfasalazine                     |
| <b>Biological Treatments</b>                      |                                   |
| L04AB02                                           | Infliximab, Infliximab biosimilar |
| L04AB04                                           | Adalimumab                        |
| L04AB06                                           | Golimumab                         |
| L04AA33                                           | Vedolizumab                       |
| L04AC05                                           | Ustekinumab                       |
| <b>Systemic Corticosteroids</b>                   |                                   |
| H02AB07                                           | Prednisone                        |
| H02AB06                                           | Prednisolone                      |
| H02AB04                                           | Methylprednisolone                |
| H02AB09                                           | Hydrocortisone                    |
| H02AB13                                           | Deflazacort                       |
| H02AB08                                           | Triamcinolone                     |
| H02AB02                                           | Dexamethasone                     |
| H02AB08                                           | Triamcinolone                     |
| H02AB01                                           | Betamethasone                     |
| <b>Topical Corticosteroids</b>                    |                                   |
| A07EA07                                           | Beclomethasone dipropionate       |
| A07EA06                                           | Budesonide                        |
| C05AA12                                           | Triamcinolone diacetate           |

**Supplementary Table S3.** ICD-9 codes for surgical procedures.

| Code            | Description               |
|-----------------|---------------------------|
| <b>Ostomies</b> |                           |
| 46.1            | Colostomy                 |
| 46.10           | Colostomy, non specified  |
| 46.11           | Temporal colostomy        |
| 46.13           | Permanent colostomy       |
| 46.14           | Delayed colostomy overage |
| 46.2            | Ileostomy                 |

|                        |                                                        |
|------------------------|--------------------------------------------------------|
| 46.20                  | Ileostomy, non-specified                               |
| 46.21                  | Temporal ileostomy                                     |
| 46.22                  | Continent ileostomy                                    |
| 46.23                  | Other permanent ileostomy                              |
| 46.24                  | Delayed ileostomy overage                              |
| 46.3                   | Other enterostomies                                    |
| 46.31                  | Other delayed enterostomies overage                    |
| 46.4                   | Intestinal stoma review                                |
| 46.40                  | Intestinal stoma review, non specified                 |
| 46.41                  | Small bowel intestinal stoma review                    |
| 46.42                  | Hernia repair pericostomy                              |
| 46.43                  | Other colonic stoma review                             |
| 46.5                   | Bowel stoma closure                                    |
| 46.50                  | Bowel stoma closure, non specified                     |
| 46.51                  | Small bowel stoma closure                              |
| 46.52                  | Colostomy or cecostomy closure                         |
| <b>Bowel Resection</b> |                                                        |
| 45.6                   | Other small bowel resection                            |
| 45.61                  | Segmentary small bowel resection / traumatic lesions   |
| 45.62                  | Other partial resections of the small intestine        |
| 45.63                  | Total resection of the small bowel                     |
| 17.3                   | Laparoscopic partial excision of colon                 |
| 17.31                  | Multiple laparoscopic segmental resection of the colon |
| 17.32                  | Laparoscopic cecectomy                                 |
| 17.33                  | Laparoscopic right hemicolectomy                       |
| 17.34                  | Laparoscopic resection of the transversal colon        |
| 17.35                  | Laparoscopic left hemicolectomy                        |
| 17.36                  | Laparoscopic sigmoidectomy                             |
| 17.39                  | Others laparoscopic segmental resection of the colon   |
| 45.7                   | Total colon resection                                  |
| 45.71                  | Multiple laparotomy segmental resection of the colon   |
| 45.72                  | Laparotomy cecostomy                                   |
| 45.73                  | Laparotomy right hemicolectomy                         |
| 45.74                  | Laparotomy resection of the transversal colon          |
| 45.75                  | Laparotomy left hemicolectomy                          |
| 45.76                  | Laparotomy sigmoidectomy                               |
| 45.79                  | Others laparotomy resection of the colon               |
| 45.8                   | Total colectomy                                        |
| 45.81                  | Total laparoscopic colectomy                           |
| 45.82                  | Total laparotomy colectomy                             |
| 45.83                  | Other non-specified colectomy                          |
| 48.4                   | Rectal resection                                       |
| 48.40                  | Rectal resection non specified                         |
| 48.41                  | Submucosal rectal resection (Soave)                    |
| 48.42                  | Laparoscopic rectal resection                          |
| 48.43                  | Laparotomy rectal resection                            |
| 48.49                  | Other rectal resections / Swenson proctectomy          |
| 48.5                   | Rectal abdominoperineal resection                      |
| 48.50                  | Rectal abdominoperineal resection, non-specified       |
| 48.51                  | Laparoscopic rectal abdominoperineal resection         |
| 48.52                  | Laparotomy rectal abdominoperineal resection           |
| 48.59                  | Other rectal abdominoperineal resection                |

|                                     |                                                                       |
|-------------------------------------|-----------------------------------------------------------------------|
| 48.6                                | Other rectal resections                                               |
| 48.61                               | Rectosigmoidectomy trans sacrum                                       |
| 48.62                               | Anterior rectal resection with simultaneous colostomy                 |
| 48.63                               | Other anterior rectal resection                                       |
| 48.64                               | Posterior rectal resection                                            |
| 48.65                               | Duhamel rectal resection                                              |
| 48.69                               | Other rectal resections; partial proctectomy, non-specified resection |
| <b>Other Therapeutic Procedures</b> |                                                                       |
| 45.52                               | Colon segment isolation; interposition                                |
| 45.9                                | Intestinal anastomosis                                                |
| 45.90                               | Intestinal anastomosis, non-specified                                 |
| 45.91                               | Small bowel to small bowel anastomosis                                |
| 45.92                               | Small bowel to rectal sleeve anastomosis (Hampton)                    |
| 45.93                               | Small bowel to colon anastomosis                                      |
| 45.94                               | Colon to colon anastomosis                                            |
| 45.95                               | Small bowel to anus anastomosis                                       |
| 46.0                                | Intestinal externalization                                            |
| 46.01                               | Small bowel externalization, ileostomy                                |
| 46.02                               | Resection of externalized small bowel                                 |
| 46.03                               | Colon externalization (first step Mikulicz procedure)                 |
| 46.04                               | Resection of externalized colon (second step Mikulicz procedure)      |
| 49.01                               | Perianal abscess incision                                             |
| 49.02                               | Other perianal abscess incision                                       |
| 49.04                               | Other perianal tissue excision                                        |
| 49.1                                | Anal fistula incision or excision                                     |
| 49.11                               | Anal fistulotomy                                                      |
| 49.12                               | Anal fistulectomy                                                     |
| 49.3                                | Local excision / destruction of anal tissue                           |
| 49.39                               | Other excision / destruction of anal tissue                           |

**Supplementary Table S4.** Use of drugs in CD from 2011 to 2017. Absolute number and percentage of CD patients treated.

|      | General Population | CD Patients | Salicylates |            | Corticosteroids |            | Non-Biological Immunosuppressive Treatments |            | Biological Treatments |            |
|------|--------------------|-------------|-------------|------------|-----------------|------------|---------------------------------------------|------------|-----------------------|------------|
|      |                    |             | Number      | Percentage | Number          | Percentage | Number                                      | Percentage | Number                | Percentage |
| 2011 | 7,515,398          | 9187        | 2647        | 28.8%      | 1455            | 15.8%      | 3022                                        | 32.9%      | 1381                  | 15.0%      |
| 2012 | 7,478,968          | 10,211      | 2762        | 27.0%      | 1526            | 14.9%      | 3315                                        | 32.5%      | 1645                  | 16.1%      |
| 2013 | 7,433,894          | 11,439      | 2825        | 24.7%      | 1620            | 14.2%      | 3529                                        | 30.9%      | 1852                  | 16.2%      |
| 2014 | 7,424,754          | 12,602      | 2905        | 23.1%      | 1767            | 14.0%      | 3800                                        | 30.2%      | 2038                  | 16.2%      |
| 2015 | 7,448,332          | 13,768      | 2905        | 21.1%      | 1909            | 13.9%      | 4073                                        | 29.6%      | 2311                  | 16.8%      |
| 2016 | 7,496,276          | 14,902      | 2828        | 19.0%      | 2057            | 13.8%      | 4353                                        | 29.2%      | 2674                  | 17.9%      |
| 2017 | 7,543,825          | 16,528      | 2831        | 17.1%      | 2264            | 13.7%      | 4893                                        | 29.6%      | 3087                  | 18.7%      |

**Supplementary Table S5.** Biologic treatment. Percentage are calculated by dividing the number of patients receiving the drug by the total number of patients with CD.

| CD Patients | Biologic Treatment |            |            |            |           |            |             |            |             |            |      |
|-------------|--------------------|------------|------------|------------|-----------|------------|-------------|------------|-------------|------------|------|
|             | Infliximab         |            | Adalimumab |            | Golimumab |            | Vedolizumab |            | Ustekinumab |            |      |
|             | Number             | Percentage | Number     | Percentage | Number    | Percentage | Number      | Percentage | Number      | Percentage |      |
| 2011        | 9187               | 754        | 8.2%       | 674        | 7.3%      | 1          | 0.0%        | 0          | 0.0%        | 4          | 0.0% |
| 2012        | 10,211             | 876        | 8.6%       | 821        | 8.0%      | 4          | 0.0%        | 0          | 0.0%        | 6          | 0.1% |
| 2013        | 11,439             | 942        | 8.2%       | 956        | 8.4%      | 7          | 0.1%        | 0          | 0.0%        | 9          | 0.1% |
| 2014        | 12,602             | 1022       | 8.1%       | 1075       | 8.5%      | 14         | 0.1%        | 0          | 0.0%        | 18         | 0.1% |
| 2015        | 13,768             | 1119       | 8.1%       | 1218       | 8.8%      | 21         | 0.2%        | 25         | 0.2%        | 45         | 0.3% |
| 2016        | 14,902             | 1258       | 8.4%       | 1364       | 9.2%      | 29         | 0.2%        | 127        | 0.9%        | 56         | 0.4% |
| 2017        | 16,528             | 1358       | 8.2%       | 1604       | 9.7%      | 24         | 0.1%        | 174        | 1.1%        | 127        | 0.8% |

**Supplementary Table S6.** Surgical and diagnostic procedures in CD from 2011 to 2017. Absolute number and rate per 1000 patients/year.

|      | General Population | CD Patients | Ostomies |                             | Resections |                             | Other Surgical Procedures |                             |
|------|--------------------|-------------|----------|-----------------------------|------------|-----------------------------|---------------------------|-----------------------------|
|      |                    |             | Number   | Rate Per 1000 Patients/Year | Number     | Rate Per 1000 Patients/Year | Number                    | Rate Per 1000 Patients/Year |
| 2011 | 7,515,398          | 9187        | 113      | 13.2                        | 206        | 24.1                        | 182                       | 21.3                        |
| 2012 | 7,478,968          | 10,211      | 102      | 10.7                        | 230        | 24.1                        | 193                       | 20.2                        |
| 2013 | 7,433,894          | 11,439      | 112      | 10.5                        | 274        | 25.7                        | 222                       | 20.8                        |
| 2014 | 7,424,754          | 12,602      | 119      | 10.1                        | 279        | 23.6                        | 211                       | 17.9                        |
| 2015 | 7,448,332          | 13,768      | 130      | 10.0                        | 274        | 21.2                        | 229                       | 17.7                        |
| 2016 | 7,496,276          | 14,902      | 111      | 7.9                         | 248        | 17.6                        | 210                       | 14.9                        |
| 2017 | 7,543,825          | 16,528      | 152      | 9.8                         | 279        | 18.0                        | 244                       | 15.7                        |

**Supplementary Table S7.** Pearson correlation coefficient (*p* value) between pharmacological treatment and surgical procedures and CD- related hospitalization.

|                                             | Ostomies       | Resections     | Other Surgical Procedures | CD-Related Hospitalization |
|---------------------------------------------|----------------|----------------|---------------------------|----------------------------|
| Salicylates                                 | 0.798 (0.031)  | 0.863 (0.012)  | 0.934 (0.002)             | 0.924 (0.003)              |
| Systemic Corticosteroids                    | 0.863 (0.012)  | 0.572 (0.179)  | 0.776 (0.040)             | 0.875 (0.010)              |
| Non-Biological Immunosuppressive Treatments | 0.840 (0.018)  | 0.706 (0.076)  | 0.868 (0.011)             | 0.934 (0.002)              |
| Biological Agents                           | -0.778 (0.039) | -0.887 (0.008) | -0.892 (0.007)            | -0.793 (0.033)             |

**Supplementary Table S8.** Hospitalization. Absolute number and rate per 1000 patients/year.

| CD Patients | Hospitalization Due to Any Cause |      | Unscheduled Hospitalization Due to Any Cause |      | Hospitalization for CD |      | Hospitalization for Infectious Disease |      | Hospitalization for Neoplasm |      |      |
|-------------|----------------------------------|------|----------------------------------------------|------|------------------------|------|----------------------------------------|------|------------------------------|------|------|
|             | Number                           | Rate | Number                                       | Rate | Number                 | Rate | Number                                 | Rate | Number                       | Rate |      |
| 2011        | 9187                             | 2334 | 272.8                                        | 1316 | 153.8                  | 793  | 92.7                                   | 93   | 10.9                         | 152  | 17.8 |
| 2012        | 10,211                           | 2525 | 264.2                                        | 1420 | 148.6                  | 850  | 88.9                                   | 117  | 12.2                         | 159  | 16.6 |
| 2013        | 11,439                           | 2923 | 273.7                                        | 1650 | 154.5                  | 930  | 87.1                                   | 142  | 13.3                         | 181  | 16.9 |
| 2014        | 12,602                           | 3305 | 279.7                                        | 1868 | 158.1                  | 919  | 77.8                                   | 147  | 12.4                         | 225  | 19.0 |
| 2015        | 13,768                           | 3484 | 269.1                                        | 1958 | 151.2                  | 924  | 71.4                                   | 186  | 14.4                         | 237  | 18.3 |
| 2016        | 14,902                           | 4190 | 298.1                                        | 2373 | 168.8                  | 1060 | 75.4                                   | 220  | 15.7                         | 309  | 22.0 |
| 2017        | 16,528                           | 4520 | 291.6                                        | 2560 | 165.1                  | 1119 | 72.2                                   | 249  | 16.1                         | 295  | 19.0 |

Supplementary Table S9. Hospitalization. Absolute number and rate per 100,000 inhabitants/year.

|      | General Population | Hospitalization Due to Any Cause |      | CD-Related Hospitalization |      |
|------|--------------------|----------------------------------|------|----------------------------|------|
|      |                    | Number                           | Rate | Number                     | Rate |
| 2011 | 7,515,398          | 2334                             | 31.1 | 793                        | 10.6 |
| 2012 | 7,478,968          | 2525                             | 33.8 | 850                        | 11.4 |
| 2013 | 7,433,894          | 2923                             | 39.3 | 930                        | 12.5 |
| 2014 | 7,424,754          | 3305                             | 44.5 | 919                        | 12.4 |
| 2015 | 7,448,332          | 3484                             | 46.8 | 924                        | 12.4 |
| 2016 | 7,496,276          | 4190                             | 55.9 | 1060                       | 14.1 |
| 2017 | 7,543,825          | 4520                             | 59.9 | 1119                       | 14.8 |

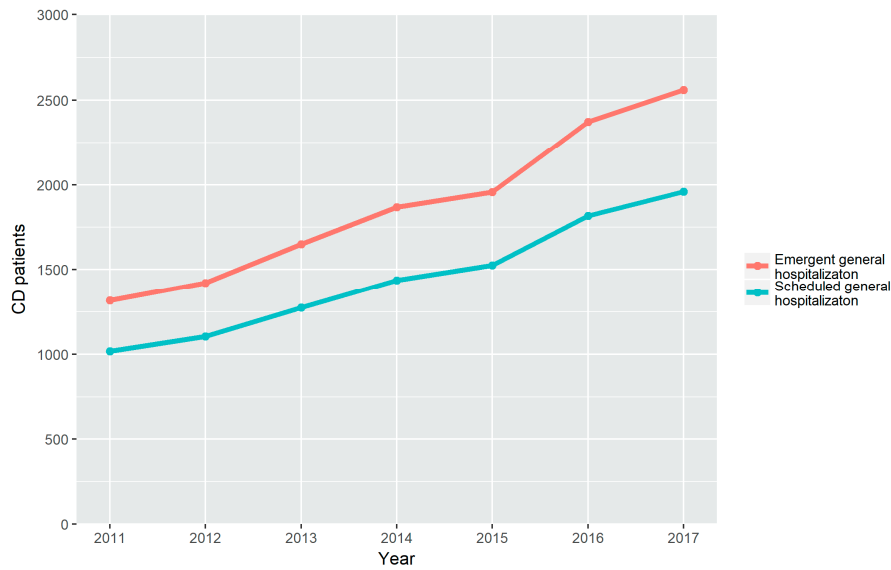

Supplementary Figure S1. Total CD patients hospitalized due to any cause either for scheduled and for emergency admissions. Rate per 1000 inhabitants/year.

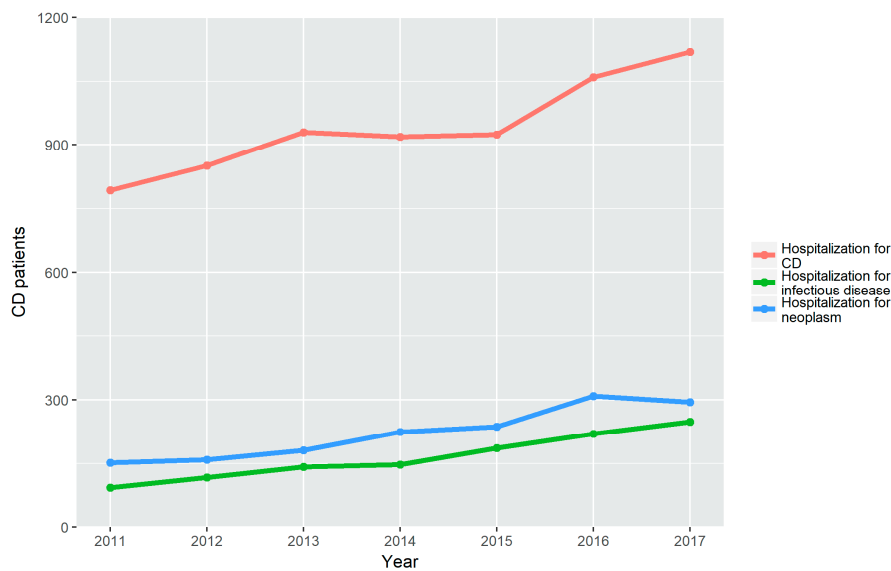

Supplementary Figure S2. CD patients hospitalized for CD cause, infections and neoplasm.
